# Supplementary material for: miR-31 is consistently inactivated in EBV-associated nasopharyngeal carcinoma and contributes to its tumorigenesis
Source: PubMed Central journal article supplement (PMC4127521; doi:10.1186/1476-4598-13-184), 2014-08-07
Supplement: 1476-4598-13-184-S5.pdf [file 1476-4598-13-184-S5.pdf]

Figure S5

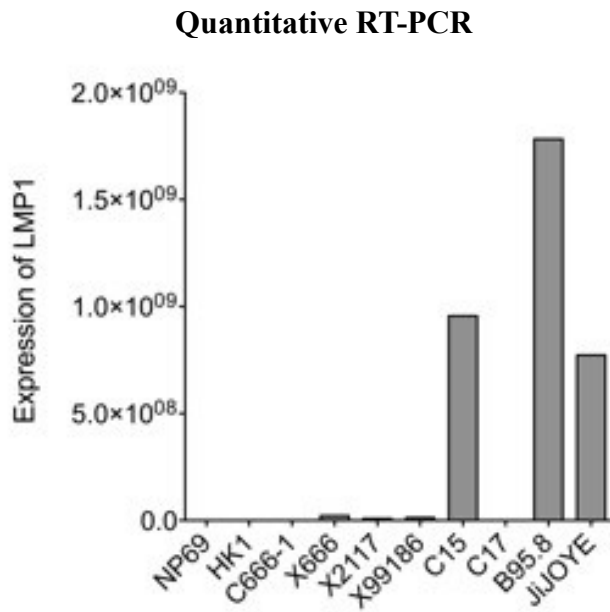

**Expression of LMP1 in EBV-positive tumor lines**

**Immunohistochemical staining**

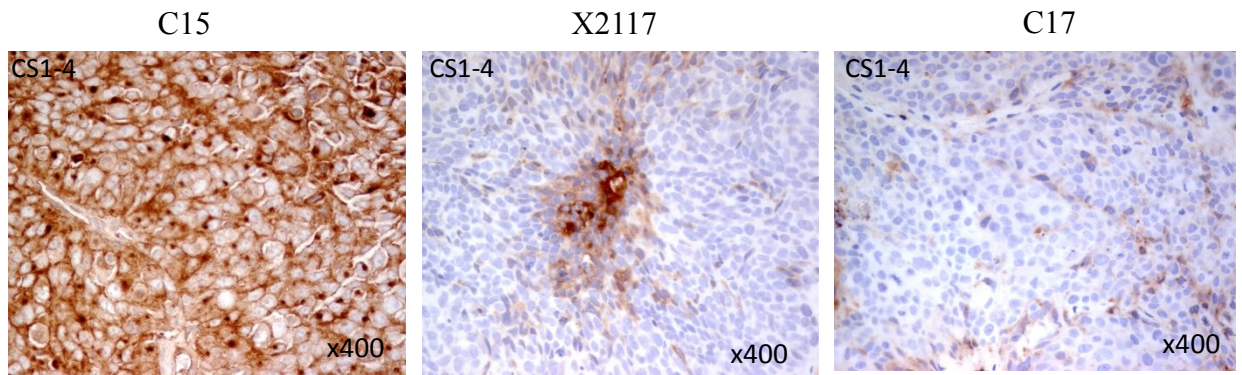

**LMP1 protein expression in EBV-positive NPC tumor lines**
