# Supplementary material for: miR-31 is consistently inactivated in EBV-associated nasopharyngeal carcinoma and contributes to its tumorigenesis
Source: PubMed Central journal article supplement (PMC4127521; doi:10.1186/1476-4598-13-184), 2014-08-07
Supplement: 1476-4598-13-184-S8.pdf [file 1476-4598-13-184-S8.pdf]

**Table S3.** List of siRNA sequences

| <b>siRNA</b>           | <b>Sequence</b>           |
|------------------------|---------------------------|
| <i>HIF1AN (FIH1)#1</i> | CCCGACTACGAGAGGTTCCCTAATT |
| <i>HIF1AN (FIH1)#2</i> | GCTCATCAGAAAGTGGCCATAATGA |
| <i>MCM2 #1</i>         | GGTCAACATGGAGGAGACCATCTAT |
| <i>MCM2 #2</i>         | AGGACACTATTGAGGTCCCTGAGAA |
