# Supplementary material for: miR-31 is consistently inactivated in EBV-associated nasopharyngeal carcinoma and contributes to its tumorigenesis
Source: Mol Cancer. 2014 Aug 7;13:184. doi: 10.1186/1476-4598-13-184 (PMC4127521; doi:10.1186/1476-4598-13-184)
Supplement: Additional file 6: Table S1 — The characteristics of NPC patients involved in this study. [file 1476-4598-13-184-S6.pdf]

**Table S1.** The characteristics of NPC patients involved in this study.

| <b>Characteristics of patients</b> | <b>n (%)</b> |
|------------------------------------|--------------|
| <b>No. of evaluable patients</b>   | 37           |
| <b>Gender</b>                      |              |
| Female                             | 8 (21.6%)    |
| Male                               | 29 (78.4%)   |
| <b>Age</b>                         |              |
| Mean                               | 50           |
| Range                              | 31-80        |
| <b>Tumor stage</b>                 |              |
| I                                  | 2 (5.4%)     |
| II                                 | 17 (45.9%)   |
| III                                | 10 (27.0%)   |
| IV                                 | 6 (16.2%)    |
